# Supplementary material
Source: PubMed Central journal article supplement (PMC7240097)
Supplement: IAI.00913-19-s0001.pdf [file IAI.00913-19-s0001.pdf]

## Supplementary materials

**Figure S1. *C. burnetii* 2072::Tn replicates with similar dynamics to WT during axenic culture in ACCM-2.** *C. burnetii* WT, 2072::Tn and 2072::Tn pFLAG-2072 were cultivated in ACCM-2, and samples were taken for quantification of GE/mL every 24 hours until 7 days post-inoculation. n = 3. Error bars denote standard deviation.

**Figure S2. Functional EirA is predominantly retained within *C. burnetii* whole cell.** Whole cell lysates (WCL) of *C. burnetii* *eirA*::Tn (A), *eirA*::Tn pEirA-FLAG (B), *eirA*::Tn pFLAG-EirA (C), and *eirA*::Tn pFLAG-EirA<sub>24-165</sub> (D) and TCA precipitated ACCM-2 media (supernatant) used to cultivate each respective strain were probed with anti-FLAG antibodies to determine EirA localization. RpoA was used as a cytoplasmic loading control to ensure ACCM-2 culture media did not contain any *C. burnetii* contamination. Immunoblots are representative of three independent biological replicates.

**Figure S3. Western blot confirming specificity of anti-EirA antibody to EirA.** Whole cell lysates of strains used for subcellular fractionations were probed with anti-EirA (A) or anti-FLAG (B). DotB was used as a cytoplasmic loading control. Blots were segmented to account for different protein expression levels requiring different exposure times in each strain.

Figure S1.

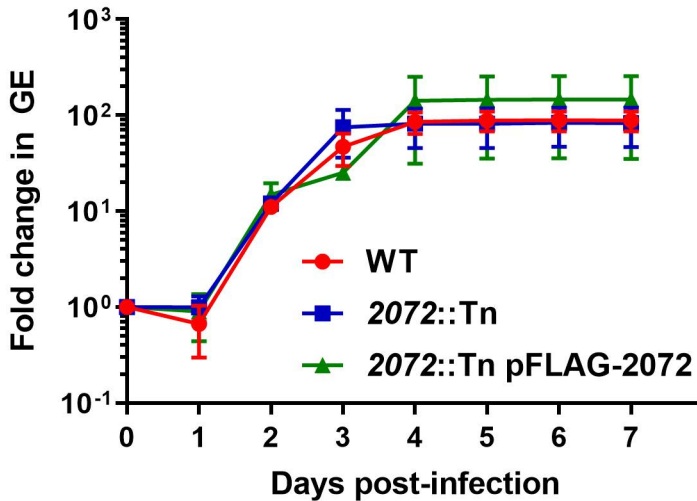

**Figure S2.**

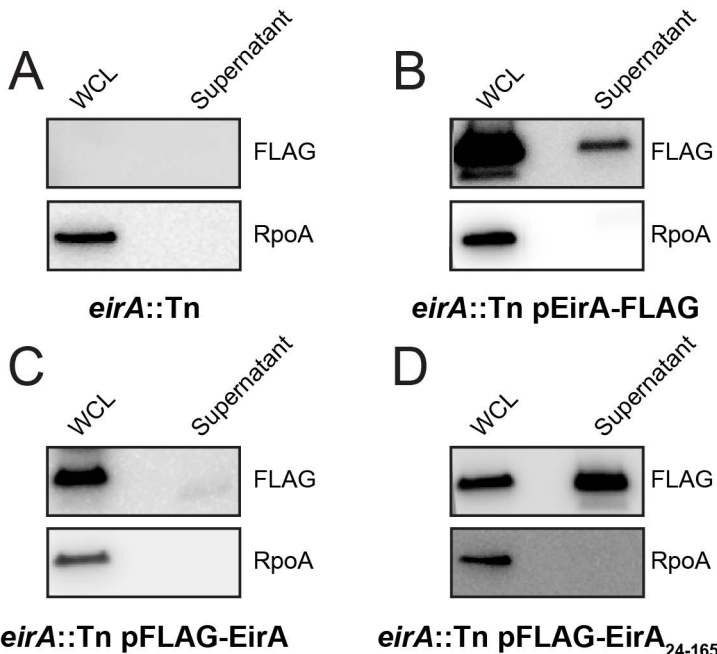

**Figure S3.**

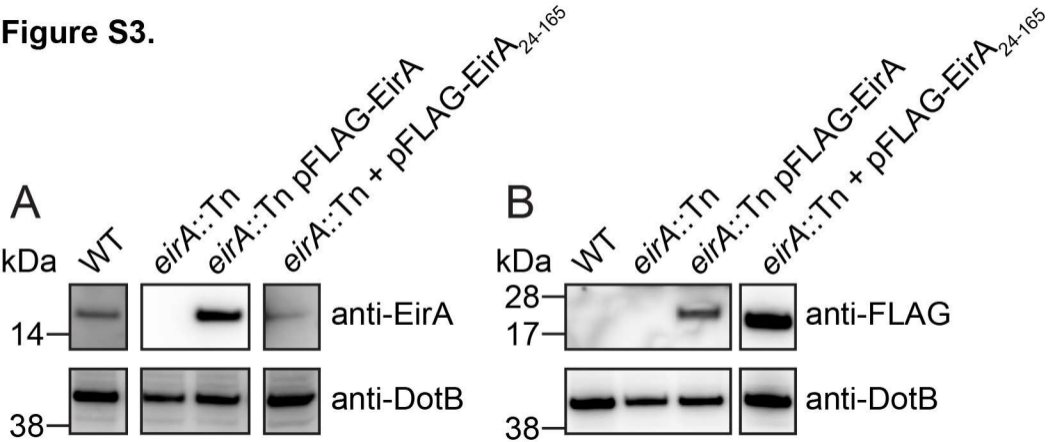

**Table S1.** Metabolite abbreviations.

| <b>Abbreviation</b> | <b>Metabolite</b>               |
|---------------------|---------------------------------|
| P                   | Phosphate                       |
| 1P                  | 1-phosphate                     |
| 2P                  | 2-phosphate                     |
| 3P                  | 3-phosphate                     |
| 4P                  | 4-phosphate                     |
| 5P                  | 5-phosphate                     |
| 6P                  | 6-phosphate                     |
| G6P                 | D-Glucose 6-phosphate           |
| F6P                 | D-Fructose 6-phosphate          |
| FBP                 | D-Fructose 1,6-bisphosphate     |
| PEP                 | Phosphoenolpyruvate             |
| R5P                 | D-Ribose 5-phosphate            |
| UMP                 | Uridine 5'-monophosphate        |
| UDP                 | Uridine 5'-diphosphate          |
| dCMP                | Deoxycytidine 5'-monophosphate  |
| AMP                 | Adenosine 5'-monophosphate      |
| ADP                 | Adenosine 5'-diphosphate        |
| IMP                 | Inosine 5'-monophosphate        |
| IDP                 | Inosine 5'-diphosphate          |
| GMP                 | Guanosine 5'-monophosphate      |
| dIMP                | Deoxyinosine 5'-monophosphate   |
| dGMP                | Deoxyguanosine 5'-monophosphate |
| L-Ala               | L-Alanine                       |
| L-Asp               | L-Aspartate                     |
| L-Glu               | L-Glutamine                     |
| L-Ile               | L-Isoleucine                    |
| L-Leu               | L-Leucine                       |
| L-Met               | L-Methionine                    |
| L-Phe               | L-Phenylalanine                 |
| L-Pro               | L-Proline                       |
| L-Ser               | L-Serine                        |
| L-Thr               | L-Threonine                     |
| L-Trp               | L-Tryptophan                    |
| L-Tyr               | L-Tyrosine                      |
| L-Val               | L-Valine                        |
| GSH                 | Glutathione                     |
| GlcNAc              | N-Acetyl-D-glucosamine          |

**Table S2.** Metabolites identified as significantly different when comparing *eirA::Tn* pFLAG-EirA to WT.

| Metabolite               | Fold change <sup>A</sup> | BH-adjusted <i>p</i> -value <sup>B</sup> |
|--------------------------|--------------------------|------------------------------------------|
| D-Fructose               | -0.56                    | 9.02 x 10 <sup>-3</sup>                  |
| D-Galactarate            | -0.83                    | 7.94 x 10 <sup>-4</sup>                  |
| G6P                      | -1.63                    | 5.55 x 10 <sup>-3</sup>                  |
| F6P                      | -1.63                    | 5.55 x 10 <sup>-3</sup>                  |
| D-Gluconate              | -0.46                    | 1.63 x 10 <sup>-3</sup>                  |
| R5P                      | -3.46                    | 2.43 x 10 <sup>-6</sup>                  |
| 2-Deoxyribose-5P         | -2.84                    | 7.94 x 10 <sup>-4</sup>                  |
| Orotate                  | -3.29                    | 1.29 x 10 <sup>-5</sup>                  |
| Xanthine                 | -1.29                    | 2.43 x 10 <sup>-6</sup>                  |
| Inosine                  | -3.09                    | 9.18 x 10 <sup>-6</sup>                  |
| IMP                      | -1.25                    | 8.29 x 10 <sup>-6</sup>                  |
| IDP                      | -0.54                    | 2.30 x 10 <sup>-3</sup>                  |
| dIMP                     | 1.68                     | 3.62 x 10 <sup>-2</sup>                  |
| Adenine                  | -2.40                    | 6.62 x 10 <sup>-6</sup>                  |
| AMP                      | -0.85                    | 2.43 x 10 <sup>-6</sup>                  |
| ADP                      | -0.46                    | 5.36 x 10 <sup>-4</sup>                  |
| Uridine                  | -1.94                    | 9.86 x 10 <sup>-4</sup>                  |
| Uracil                   | -1.92                    | 1.30 x 10 <sup>-4</sup>                  |
| UMP                      | -1.96                    | 7.24 x 10 <sup>-5</sup>                  |
| dCMP                     | -1.11                    | 6.81 x 10 <sup>-3</sup>                  |
| dGMP                     | -0.85                    | 2.43 x 10 <sup>-6</sup>                  |
| L-Arg                    | 1.40                     | 1.73 x 10 <sup>-3</sup>                  |
| L-Asp                    | 1.22                     | 4.02 x 10 <sup>-5</sup>                  |
| L-Citrulline             | 0.62                     | 3.68 x 10 <sup>-2</sup>                  |
| L-Cystathione            | 0.24                     | 2.87 x 10 <sup>-3</sup>                  |
| L-Glu                    | 1.08                     | 2.43 x 10 <sup>-6</sup>                  |
| L-Ser                    | 1.08                     | 5.97 x 10 <sup>-6</sup>                  |
| L-Met                    | 0.69                     | 2.43 x 10 <sup>-6</sup>                  |
| L-Val                    | -0.83                    | 1.19 x 10 <sup>-2</sup>                  |
| L-Ile                    | -0.61                    | 5.55 x 10 <sup>-3</sup>                  |
| L-Leu                    | 0.78                     | 2.88 x 10 <sup>-4</sup>                  |
| L-Lys                    | 1.50                     | 1.43 x 10 <sup>-4</sup>                  |
| L-Pro                    | -2.06                    | 3.60 x 10 <sup>-7</sup>                  |
| L-Ornithine              | -0.77                    | 2.09 x 10 <sup>-2</sup>                  |
| L-Tyr                    | 0.16                     | 1.76 x 10 <sup>-2</sup>                  |
| GSH                      | -0.59                    | 5.78 x 10 <sup>-6</sup>                  |
| 3'-Methyladenine         | 0.87                     | 9.59 x 10 <sup>-4</sup>                  |
| 2'-Methylcitrate         | -3.28                    | 5.36 x 10 <sup>-4</sup>                  |
| Meso-2,6-Diaminopimelate | 1.50                     | 4.85 x 10 <sup>-5</sup>                  |
| GDP-D-mannose            | -1.14                    | 5.63 x 10 <sup>-6</sup>                  |
| UDP-GlcNAc               | -1.20                    | 2.50 x 10 <sup>-5</sup>                  |
| D-Glucono-1,4-lactone    | -1.08                    | 9.68 x 10 <sup>-3</sup>                  |
| D-Galactono-1,4-lactone  | -1.61                    | 1.90 x 10 <sup>-2</sup>                  |
| Biotin                   | -2.29                    | 2.61 x 10 <sup>-3</sup>                  |

|           |       |                       |
|-----------|-------|-----------------------|
| Biopterin | -1.70 | $1.59 \times 10^{-2}$ |
| NADH      | 0.45  | $3.78 \times 10^{-3}$ |
| NADP      | -0.46 | $5.55 \times 10^{-3}$ |

---

<sup>A</sup>Positive fold change value denotes metabolites with significantly high abundance, while negative fold change value denotes metabolites with significantly lower abundance in *C. burnetii eirA::Tn* pFLAG-EirA samples. <sup>B</sup>Benjamini-Hochberg (BH).

**Table S3.** Metabolites identified as significantly different when comparing *eirA::Tn* pFLAG-EirA to *eirA::Tn*.

| Metabolite        | Fold change | BH-adjusted <i>p</i> -value |
|-------------------|-------------|-----------------------------|
| D-Fructose        | 0.77        | 2.29 x 10 <sup>-4</sup>     |
| D-Galactarate     | 0.56        | 2.29 x 10 <sup>-4</sup>     |
| G6P               | 1.56        | 6.16 x 10 <sup>-3</sup>     |
| F6P               | 1.56        | 6.16 x 10 <sup>-3</sup>     |
| PEP               | 1.32        | 2.17 x 10 <sup>-2</sup>     |
| D-Gluconate       | 0.59        | 3.34 x 10 <sup>-4</sup>     |
| R5P               | 3.37        | 2.48 x 10 <sup>-7</sup>     |
| 2-Deoxyribose-5P  | 2.68        | 5.69 x 10 <sup>-4</sup>     |
| Succinate         | -0.28       | 1.48 x 10 <sup>-4</sup>     |
| Orotate           | 2.70        | 1.30 x 10 <sup>-4</sup>     |
| Inosine           | 3.22        | 2.48 x 10 <sup>-7</sup>     |
| IMP               | 1.02        | 1.48 x 10 <sup>-4</sup>     |
| IDP               | 0.38        | 7.75 x 10 <sup>-3</sup>     |
| dIMP              | -1.43       | 6.16 x 10 <sup>-3</sup>     |
| Adenine           | 2.34        | 2.50 x 10 <sup>-6</sup>     |
| AMP               | 0.66        | 1.50 x 10 <sup>-3</sup>     |
| ADP               | 0.25        | 6.16 x 10 <sup>-3</sup>     |
| Uridine           | 2.35        | 2.35 x 10 <sup>-4</sup>     |
| Uracil            | 1.36        | 3.52 x 10 <sup>-3</sup>     |
| UMP               | 1.46        | 4.15 x 10 <sup>-5</sup>     |
| dCMP              | 1.32        | 2.50 x 10 <sup>-6</sup>     |
| GMP               | -0.37       | 4.09 x 10 <sup>-2</sup>     |
| dGMP              | 0.64        | 2.49 x 10 <sup>-3</sup>     |
| L-Arg             | -0.65       | 1.79 x 10 <sup>-6</sup>     |
| L-Asp             | -0.60       | 1.31 x 10 <sup>-6</sup>     |
| L-Citrulline      | -0.18       | 1.42 x 10 <sup>-2</sup>     |
| L-Cystathione     | -0.18       | 3.70 x 10 <sup>-3</sup>     |
| L-Cysteate        | -0.30       | 2.51 x 10 <sup>-3</sup>     |
| L-Glu             | -0.39       | 3.18 x 10 <sup>-5</sup>     |
| L-Ser             | -0.49       | 4.46 x 10 <sup>-6</sup>     |
| L-Met             | -0.26       | 3.38 x 10 <sup>-3</sup>     |
| L-Val             | 0.51        | 5.69 x 10 <sup>-4</sup>     |
| L-Ile             | 0.28        | 8.54 x 10 <sup>-3</sup>     |
| L-Leu             | -0.40       | 1.26 x 10 <sup>-4</sup>     |
| L-Lys             | -0.46       | 4.83 x 10 <sup>-3</sup>     |
| L-Pro             | 1.92        | 2.48 x 10 <sup>-7</sup>     |
| L-Ornithine       | 0.67        | 2.11 x 10 <sup>-4</sup>     |
| L-Thr             | -0.23       | 6.36 x 10 <sup>-3</sup>     |
| Homoserine        | 0.51        | 1.00 x 10 <sup>-4</sup>     |
| GSH               | 0.52        | 3.18 x 10 <sup>-5</sup>     |
| Methylmalonate    | -0.28       | 1.48 x 10 <sup>-4</sup>     |
| N-Acetyl-L-Lysine | -0.29       | 1.27 x 10 <sup>-3</sup>     |
| 3'-Methyladenine  | -0.30       | 1.11 x 10 <sup>-5</sup>     |
| 2'-Methylcitrate  | 2.78        | 1.48 x 10 <sup>-4</sup>     |



|                          |       |                       |
|--------------------------|-------|-----------------------|
| Oxalate                  | -0.29 | $1.27 \times 10^{-3}$ |
| Pthalate                 | -0.37 | $4.60 \times 10^{-3}$ |
| Meso-2,6-Diaminopimelate | -0.64 | $9.55 \times 10^{-7}$ |
| D-Mannitol               | 0.28  | $1.39 \times 10^{-2}$ |
| D-Sorbitol               | 0.43  | $3.14 \times 10^{-2}$ |
| GDP-D-mannose            | 0.81  | $3.05 \times 10^{-5}$ |
| UDP-GlcNAc               | 0.83  | $1.19 \times 10^{-4}$ |
| D-Glucono-1,4-lactone    | 0.85  | $1.40 \times 10^{-3}$ |
| Biotin                   | 2.66  | $2.04 \times 10^{-3}$ |
| Biopterin                | 1.75  | $1.02 \times 10^{-2}$ |

<sup>A</sup>Positive fold change value denotes metabolites with significantly high abundance, while negative fold change value denotes metabolites with significantly lower abundance in *C. burnetii eirA::Tn* pFLAG-EirA samples. <sup>B</sup>Benjamini-Hochberg (BH).
